# Supplementary material for: Supply risk considerations for photoelectrochemical water splitting materials
Source: Royal Society of Chemistry journal article supplement (doi:10.1039/d3ee04369j), 2024-01-01
Supplement: d3ee04369j1.xlsx [file d3ee04369j1.xlsx]

## Sheet: CoverSheet
Energy & Environmental Science	https://pubs.rsc.org/en/journals/journalissues/ee
Supplementary data for:
Supply risk considerations for photoelectrochemical water splitting materials
Martin Hillenbrand, Christoph Helbig, and Roland Marschall
2024
https://doi.org/10.1039/D3EE04369J
This supplementary data provides numercial values behind tables and plots and data plotted in the figures in the paper. The supplementary information is available, as well as the article itself, via: https://doi.org/10.1039/D3EE04369J.
Sheet name	Content
Tab 3	Data from table 3
Fig 2&3	Data from figure 2 and 3
Fig 4	Data from figure 4
Fig 5	Data from figure 5

## Sheet: Tab 3
Table 3 - Supply risk assessment of elements for the present and future scenario, raw values before normalization	S1 Scarcity, based on reserves	S2 Scarcity, based on resources	S3 Dependence on primary production	D1 Demand growth	D2 By-product dependence	D3 Sector Competition	D4 Lack of substitution options	C1 Concentration, based on production	C2 Concentration, based on reserves	P1 Political Instability, based on production	P2 Regulation (PPI), based on production	P3 Regulation (HDI), based on production	P4 Political Instability, based on reserves	P5 Regulation (PPI), based on reserves	P6 Regulation (HDI), based on reserves
unit	years	years	%	%	%	0 to 100	0 to 100	HHI	HHI	-2.5 to 2.5	0 to 100	0 to 1	-2.5 to 2.5	0 to 100	0 to 1
vanadium	243.523	600.114	1	0.024689	82	13	63	4951.5	2788.94	-0.532191	49.0343	0.772958	-0.157973	58.7866	0.824206
iron	53.0956	141.493	22.8	0	1	24	57	1884.97	1767.08	-0.0314338	52.4059	0.823668	-0.025041	51.7949	0.749422
copper	41.8506	99.2392	22.23	0.00673379	9	36	70	1278.01	1334.25	-0.208935	47.2848	0.678375	-0.07752	45.1795	0.633395
zinc	14.2902	149.925	9.765	0	10	17	38	1693.9	1970.43	-0.18031	43.0347	0.673477	0.0583002	60.2209	0.833696
tin	15.1671	1509.82	31	0	3	49	36	1739.54	1229.12	-0.66371	36.4516	0.707822	-0.559554	39.4885	0.689144
tantalum	173.842	34768.4	0.9625	0.031299	28	57	41	2532.51	4304.3	-0.993039	27.0033	0.574556	-0.068612	55.0206	0.823038
tungsten	44.9891	4535.8	42	0	5	36	53	7231.68	3782.35	-0.417566	40.3423	0.754509	-0.289845	29.0194	0.489248
bismuth	18.4276	418.828	0	0	90	31	46	6559.58	4661.95	-0.252598	36.6207	0.763854	-0.343992	32.5732	0.654236

## Sheet: Fig 2&3
Fig 2 & 3 - Supply risk assessment of elements for the present and future scenario, normalized values	S1 Scarcity, based on reserves	S2 Scarcity, based on resources	S3 Dependence on primary production	D1 Demand growth	D2 By-product dependence	D3 Sector Competition	D4 Lack of substitution options	C1 Concentration, based on production	C2 Concentration, based on reserves	P1 Political Instability, based on production	P2 Regulation (PPI), based on production	P3 Regulation (HDI), based on production	P4 Political Instability, based on reserves	P5 Regulation (PPI), based on reserves	P6 Regulation (HDI), based on reserves
vanadium	0	0	99	24.689	82	13	63	84.7911	72.3691	60.6438	50.9657	70.5122	53.1595	41.2134	79.0965
iron	66.8277	45.81	77.2	0	1	24	57	63.8917	62.4941	50.6287	47.5941	79.0064	50.5008	48.2051	66.5699
copper	77.6181	70.3793	77.77	6.73379	9	36	70	55.4822	56.4142	54.1787	52.7152	54.6692	51.5504	54.8205	47.1348
zinc	95.5083	40.0525	90.235	0	10	17	38	61.5789	64.8512	53.6062	56.9653	53.8487	48.834	39.7791	80.6861
tin	95.1262	0	69	0	3	49	36	62.1541	54.6381	63.2742	63.5484	59.6017	61.1911	60.5115	56.473
tantalum	0	0	99.0375	31.299	28	57	41	70.2819	81.7599	69.8608	72.9967	37.279	51.3722	44.9794	78.9008
tungsten	74.81	0	58	0	5	36	53	92.9879	78.9625	58.3513	59.6577	67.422	55.7969	70.9806	22.9896
bismuth	93.5978	0	100	0	90	31	46	90.8771	83.4872	55.052	63.3793	68.9873	56.8798	67.4268	50.6259

## Sheet: Fig 4
Fig 4 - Difference betwen present and future scenarios by indicator groups	S Risko of supply reduction	D Risk of demand increase	C Concentration risk	P Political risk
vanadium	0	2.72269	-3.1055	-0.721032
iron	-2.62721	-0.291667	-0.349398	-0.996116
copper	-0.904858	-0.463879	0.233005	-0.671447
zinc	-6.93198	-0.0625	0.818073	0.406582
tin	-11.8908	-2.25	-1.879	-0.687397
tantalum	0	-1.47294	2.86949	-0.407008
tungsten	-9.35125	-1.04167	-3.50636	-2.97199
bismuth	-11.6997	0.895833	-1.84747	-1.04051

## Sheet: Fig 5
Fig 5 - Supply risk assessment for present scenario (A) and future scenario (B) using different aggregation methods, weighted results
material_ID	material_name	indicator	equal based scenario	mass based scenario	cost based scenario	max element wise based scenario
1	CuO	S1 Scarcity, based on reserves	9.70227	9.70227	9.70227	9.70227
2	Cu_2O	S1 Scarcity, based on reserves	9.70227	9.70227	9.70227	9.70227
3	CuBi_2O_4	S1 Scarcity, based on reserves	10.701	11.2343	11.1859	11.6997
4	BiVO_4	S1 Scarcity, based on reserves	5.84987	9.4084	6.00084	11.6997
5	Ta_3N_5	S1 Scarcity, based on reserves	0	0	0	0
6	α-Fe_2O_3	S1 Scarcity, based on reserves	8.35346	8.35346	8.35346	8.35346
7	ZnFe_2O_4	S1 Scarcity, based on reserves	10.146	9.67812	11.5845	11.9385
8	WO_3	S1 Scarcity, based on reserves	9.35125	9.35125	9.35125	9.35125
9	α-SnWO_4	S1 Scarcity, based on reserves	10.621	10.3486	11.5983	9.35125
1	CuO	S2 Scarcity, based on resources	8.79741	8.79741	8.79741	8.79741
2	Cu_2O	S2 Scarcity, based on resources	8.79741	8.79741	8.79741	8.79741
3	CuBi_2O_4	S2 Scarcity, based on resources	4.3987	2.05004	0.94238	0
4	BiVO_4	S2 Scarcity, based on resources	0	0	0	0
5	Ta_3N_5	S2 Scarcity, based on resources	0	0	0	0
6	α-Fe_2O_3	S2 Scarcity, based on resources	5.72625	5.72625	5.72625	5.72625
7	ZnFe_2O_4	S2 Scarcity, based on resources	5.36641	5.46033	5.01085	5.72625
8	WO_3	S2 Scarcity, based on resources	0	0	0	0
9	α-SnWO_4	S2 Scarcity, based on resources	0	0	0	0
1	CuO	S3 Dependence on primary production	9.72125	9.72125	9.72125	9.72125
2	Cu_2O	S3 Dependence on primary production	9.72125	9.72125	9.72125	9.72125
3	CuBi_2O_4	S3 Dependence on primary production	11.1106	11.8525	11.7851	12.5
4	BiVO_4	S3 Dependence on primary production	12.4375	12.4755	12.4391	12.5
5	Ta_3N_5	S3 Dependence on primary production	12.3797	12.3797	12.3797	12.3797
6	α-Fe_2O_3	S3 Dependence on primary production	9.65	9.65	9.65	9.65
7	ZnFe_2O_4	S3 Dependence on primary production	10.4647	10.252	11.1185	11.2794
8	WO_3	S3 Dependence on primary production	7.25	7.25	7.25	7.25
9	α-SnWO_4	S3 Dependence on primary production	7.9375	7.79002	8.46665	7.25
1	CuO	D1 Demand growth	0.420862	0.420862	0.420862	0.420862
2	Cu_2O	D1 Demand growth	0.420862	0.420862	0.420862	0.420862
3	CuBi_2O_4	D1 Demand growth	0.210431	0.0980724	0.108272	0
4	BiVO_4	D1 Demand growth	0.771533	0.302201	0.751621	0
5	Ta_3N_5	D1 Demand growth	1.95619	1.95619	1.95619	1.95619
6	α-Fe_2O_3	D1 Demand growth	0	0	0	0
7	ZnFe_2O_4	D1 Demand growth	0	0	0	0
8	WO_3	D1 Demand growth	0	0	0	0
9	α-SnWO_4	D1 Demand growth	0	0	0	0
1	CuO	D2 By-product dependence	0.5625	0.5625	0.5625	0.5625
2	Cu_2O	D2 By-product dependence	0.5625	0.5625	0.5625	0.5625
3	CuBi_2O_4	D2 By-product dependence	3.09375	4.4453	4.32261	5.625
4	BiVO_4	D2 By-product dependence	5.375	5.52708	5.38145	5.625
5	Ta_3N_5	D2 By-product dependence	1.75	1.75	1.75	1.75
6	α-Fe_2O_3	D2 By-product dependence	0.0625	0.0625	0.0625	0.0625
7	ZnFe_2O_4	D2 By-product dependence	0.34375	0.270339	0.569458	0.625
8	WO_3	D2 By-product dependence	0.3125	0.3125	0.3125	0.3125
9	α-SnWO_4	D2 By-product dependence	0.25	0.263408	0.201895	0.3125
1	CuO	D3 Sector Competition	2.25	2.25	2.25	2.25
2	Cu_2O	D3 Sector Competition	2.25	2.25	2.25	2.25
3	CuBi_2O_4	D3 Sector Competition	2.09375	2.01032	2.01789	1.9375
4	BiVO_4	D3 Sector Competition	1.375	1.71717	1.38952	1.9375
5	Ta_3N_5	D3 Sector Competition	3.5625	3.5625	3.5625	3.5625
6	α-Fe_2O_3	D3 Sector Competition	1.5	1.5	1.5	1.5
7	ZnFe_2O_4	D3 Sector Competition	1.28125	1.33835	1.1057	1.0625
8	WO_3	D3 Sector Competition	2.25	2.25	2.25	2.25
9	α-SnWO_4	D3 Sector Competition	2.65625	2.5691	2.96893	2.25
1	CuO	D4 Lack of substitution options	4.375	4.375	4.375	4.375
2	Cu_2O	D4 Lack of substitution options	4.375	4.375	4.375	4.375
3	CuBi_2O_4	D4 Lack of substitution options	3.625	3.22454	3.26089	2.875
4	BiVO_4	D4 Lack of substitution options	3.40625	3.08308	3.39254	2.875
5	Ta_3N_5	D4 Lack of substitution options	2.5625	2.5625	2.5625	2.5625
6	α-Fe_2O_3	D4 Lack of substitution options	3.5625	3.5625	3.5625	3.5625
7	ZnFe_2O_4	D4 Lack of substitution options	2.96875	3.12373	2.49226	2.375
8	WO_3	D4 Lack of substitution options	3.3125	3.3125	3.3125	3.3125
9	α-SnWO_4	D4 Lack of substitution options	2.78125	2.89521	2.37236	3.3125
1	CuO	C1 Concentration, based on production	13.8705	13.8705	13.8705	13.8705
2	Cu_2O	C1 Concentration, based on production	13.8705	13.8705	13.8705	13.8705
3	CuBi_2O_4	C1 Concentration, based on production	18.2949	20.6573	20.4428	22.7193
4	BiVO_4	C1 Concentration, based on production	21.9585	22.4213	21.9782	22.7193
5	Ta_3N_5	C1 Concentration, based on production	17.5705	17.5705	17.5705	17.5705
6	α-Fe_2O_3	C1 Concentration, based on production	15.9729	15.9729	15.9729	15.9729
7	ZnFe_2O_4	C1 Concentration, based on production	15.6838	15.7593	15.4518	15.3947
8	WO_3	C1 Concentration, based on production	23.247	23.247	23.247	23.247
9	α-SnWO_4	C1 Concentration, based on production	19.3928	20.2196	16.4263	23.247
1	CuO	C2 Concentration, based on reserves	14.1035	14.1035	14.1035	14.1035
2	Cu_2O	C2 Concentration, based on reserves	14.1035	14.1035	14.1035	14.1035
3	CuBi_2O_4	C2 Concentration, based on reserves	17.4877	19.2946	20.1468	20.8718
4	BiVO_4	C2 Concentration, based on reserves	19.482	20.3274	19.5537	18.0923
5	Ta_3N_5	C2 Concentration, based on reserves	20.44	20.44	20.44	20.44
6	α-Fe_2O_3	C2 Concentration, based on reserves	15.6235	15.6235	15.6235	15.6235
7	ZnFe_2O_4	C2 Concentration, based on reserves	15.9182	15.8413	16.2093	15.6235
8	WO_3	C2 Concentration, based on reserves	19.7406	19.7406	19.7406	19.7406
9	α-SnWO_4	C2 Concentration, based on reserves	16.7001	17.3523	13.7608	19.7406
1	CuO	P1 Political Instability, based on production	4.51489	4.51489	4.51489	4.51489
2	Cu_2O	P1 Political Instability, based on production	4.51489	4.51489	4.51489	4.51489
3	CuBi_2O_4	P1 Political Instability, based on production	4.55128	4.57071	4.56894	4.58766
4	BiVO_4	P1 Political Instability, based on production	4.82066	4.67893	4.81464	4.58766
5	Ta_3N_5	P1 Political Instability, based on production	5.82173	5.82173	5.82173	5.82173
6	α-Fe_2O_3	P1 Political Instability, based on production	4.21906	4.21906	4.21906	4.21906
7	ZnFe_2O_4	P1 Political Instability, based on production	4.34312	4.31074	4.44268	4.46718
8	WO_3	P1 Political Instability, based on production	4.86261	4.86261	4.86261	4.86261
9	α-SnWO_4	P1 Political Instability, based on production	5.06773	5.02373	5.22561	4.86261
1	CuO	P2 Regulation (PPI), based on production	4.39294	4.39294	4.39294	4.39294
2	Cu_2O	P2 Regulation (PPI), based on production	4.39294	4.39294	4.39294	4.39294
3	CuBi_2O_4	P2 Regulation (PPI), based on production	4.83727	5.07453	5.05299	5.28161
4	BiVO_4	P2 Regulation (PPI), based on production	4.76437	5.07902	4.77772	5.28161
5	Ta_3N_5	P2 Regulation (PPI), based on production	6.08306	6.08306	6.08306	6.08306
6	α-Fe_2O_3	P2 Regulation (PPI), based on production	3.96618	3.96618	3.96618	3.96618
7	ZnFe_2O_4	P2 Regulation (PPI), based on production	4.35664	4.25473	4.67	4.74711
8	WO_3	P2 Regulation (PPI), based on production	4.97147	4.97147	4.97147	4.97147
9	α-SnWO_4	P2 Regulation (PPI), based on production	5.13359	5.09881	5.25836	4.97147
1	CuO	P3 Regulation (HDI), based on production	4.55577	4.55577	4.55577	4.55577
2	Cu_2O	P3 Regulation (HDI), based on production	4.55577	4.55577	4.55577	4.55577
3	CuBi_2O_4	P3 Regulation (HDI), based on production	5.15235	5.4709	5.44198	5.74894
4	BiVO_4	P3 Regulation (HDI), based on production	5.81248	5.77383	5.81084	5.74894
5	Ta_3N_5	P3 Regulation (HDI), based on production	3.10659	3.10659	3.10659	3.10659
6	α-Fe_2O_3	P3 Regulation (HDI), based on production	6.58387	6.58387	6.58387	6.58387
7	ZnFe_2O_4	P3 Regulation (HDI), based on production	5.53563	5.80924	4.6944	4.48739
8	WO_3	P3 Regulation (HDI), based on production	5.6185	5.6185	5.6185	5.6185
9	α-SnWO_4	P3 Regulation (HDI), based on production	5.29266	5.36256	5.04186	5.6185
1	CuO	P4 Political Instability, based on reserves	4.29587	4.29587	4.29587	4.29587
2	Cu_2O	P4 Political Instability, based on reserves	4.29587	4.29587	4.29587	4.29587
3	CuBi_2O_4	P4 Political Instability, based on reserves	4.51793	4.63649	4.69241	4.73999
4	BiVO_4	P4 Political Instability, based on reserves	4.58497	4.67927	4.59297	4.73999
5	Ta_3N_5	P4 Political Instability, based on reserves	4.28102	4.28102	4.28102	4.28102
6	α-Fe_2O_3	P4 Political Instability, based on reserves	4.2084	4.2084	4.2084	4.2084
7	ZnFe_2O_4	P4 Political Instability, based on reserves	4.13895	4.15708	4.07033	4.0695
8	WO_3	P4 Political Instability, based on reserves	4.64974	4.64974	4.64974	4.64974
9	α-SnWO_4	P4 Political Instability, based on reserves	4.8745	4.82628	5.09177	4.64974
1	CuO	P5 Regulation (PPI), based on reserves	4.56838	4.56838	4.56838	4.56838
2	Cu_2O	P5 Regulation (PPI), based on reserves	4.56838	4.56838	4.56838	4.56838
3	CuBi_2O_4	P5 Regulation (PPI), based on reserves	5.09364	5.3741	5.50637	5.6189
4	BiVO_4	P5 Regulation (PPI), based on reserves	4.52668	5.19109	4.58301	5.6189
5	Ta_3N_5	P5 Regulation (PPI), based on reserves	3.74829	3.74829	3.74829	3.74829
6	α-Fe_2O_3	P5 Regulation (PPI), based on reserves	4.01709	4.01709	4.01709	4.01709
7	ZnFe_2O_4	P5 Regulation (PPI), based on reserves	3.66601	3.75765	3.31912	3.31493
8	WO_3	P5 Regulation (PPI), based on reserves	5.91505	5.91505	5.91505	5.91505
9	α-SnWO_4	P5 Regulation (PPI), based on reserves	5.47884	5.57242	5.05716	5.91505
1	CuO	P6 Regulation (HDI), based on reserves	3.9279	3.9279	3.9279	3.9279
2	Cu_2O	P6 Regulation (HDI), based on reserves	3.9279	3.9279	3.9279	3.9279
3	CuBi_2O_4	P6 Regulation (HDI), based on reserves	4.07336	4.15103	4.18766	4.21882
4	BiVO_4	P6 Regulation (HDI), based on reserves	5.4051	4.68347	5.34391	4.21882
5	Ta_3N_5	P6 Regulation (HDI), based on reserves	6.57506	6.57506	6.57506	6.57506
6	α-Fe_2O_3	P6 Regulation (HDI), based on reserves	5.54749	5.54749	5.54749	5.54749
7	ZnFe_2O_4	P6 Regulation (HDI), based on reserves	6.13567	5.98214	6.71682	6.72384
8	WO_3	P6 Regulation (HDI), based on reserves	1.9158	1.9158	1.9158	1.9158
9	α-SnWO_4	P6 Regulation (HDI), based on reserves	3.31094	3.01165	4.6596	1.9158
